# Supplementary material for: Evolution and Stress Responses of CLO Genes and Potential Function of the GhCLO06 Gene in Salt Resistance of Cotton
Source: Front Plant Sci. 2022 Jan 17;12:801239. doi: 10.3389/fpls.2021.801239 (PMC8802827; doi:10.3389/fpls.2021.801239)
Supplement: Supplementary Table 3 — Detailed physicochemical characteristics of CLO proteins in G. hirsutum, G. barbadense, G. arboreum, and G. raimondii. [file Table_3.XLSX]

## Sheet: Sheet1
Table S3. Detailed physicochemical characteristics of CLO proteins in G. hirsutum, G. barbadense, G. arboreum and G. raimondii.
Species	Gene Name	Gene ID	Assembly	Chromosome	Gene Length (bp)	CDS Length (bp)	Exon Number	Protein Length (aa)	Molecular Weight (kDa)	Isoelectric Point	Subcellular Localization	Protein classification
Gossypium raimondii	GrCLO01	Gorai.002G173200.1	JGI	Chr02	2899	609	7	202	22.754	8.665	Cytoplasmic	L-caleosin
	GrCLO02	Gorai.006G068400.1	JGI	Chr06	2795	696	6	231	26.569	8.942	Cytoplasmic	H-caleosin
	GrCLO03	Gorai.006G072700.1	JGI	Chr06	2106	708	6	235	26.453	5.884	Periplasmic	H-caleosin
	GrCLO04	Gorai.006G072800.1	JGI	Chr06	1802	699	6	232	26.616	6.51	Cytoplasmic	H-caleosin
	GrCLO05	Gorai.006G072900.1	JGI	Chr06	4267	864	7	287	33.283	8.396	Cytoplasmic	H-caleosin
	GrCLO06	Gorai.008G167700.1	JGI	Chr08	2024	630	6	209	23.518	7.661	Cytoplasmic	L-caleosin
	GrCLO07	Gorai.011G178600.1	JGI	Chr11	4119	711	6	236	26.871	6.793	Periplasmic	H-caleosin
	GrCLO08	Gorai.011G178700.1	JGI	Chr11	4145	711	6	236	26.665	6.146	Cytoplasmic	H-caleosin
	GrCLO09	Gorai.012G182000.1	JGI	Chr12	5368	621	6	206	23.012	7.163	Extracellular	L-caleosin
Gossypium arboreum	GaCLO01	Ga02G0996.1	CRI	Chr02	1334	609	6	202	22.741	8.434	Cytoplasmic	L-caleosin
	GaCLO02	Ga09G0728.1	CRI	Chr09	2527	726	6	241	27.453	8.232	Cytoplasmic	H-caleosin
	GaCLO03	Ga10G1252.1	CRI	Chr10	3765	711	6	236	26.611	6.045	Cytoplasmic	H-caleosin
	GaCLO04	Ga10G1253.1	CRI	Chr10	3175	624	5	207	23.572	8.161	Periplasmic	H-caleosin
	GaCLO05	Ga12G1332.1	CRI	Chr12	1573	630	6	209	23.632	8.919	Cytoplasmic	L-caleosin
	GaCLO06	Ga14G1756.1	CRI	tig00015727	3179	621	6	206	23.106	8.909	Periplasmic	L-caleosin
	GaCLO07	Ga14G2764.1	CRI	tig00024850	1723	708	6	235	26.487	5.883	Periplasmic	H-caleosin
	GaCLO08	Ga14G2765.1	CRI	tig00024850	2395	696	7	231	26.417	6.087	Periplasmic	H-caleosin
	GaCLO09	Ga14G2766.1	CRI	tig00024850	1638	690	6	229	26.165	6.719	Cytoplasmic	H-caleosin
	GaCLO10	Ga14G2767.1	CRI	tig00024850	4246	858	7	285	32.547	8.115	Cytoplasmic	H-caleosin
Gossypium hirsutum	GhCLO01	GH_A01G1600.1	ZJU	A01	1333	609	6	202	22.76	8.916	Cytoplasmic	L-caleosin
	GhCLO02	GH_A04G1715.1	ZJU	A04	2777	621	6	206	23.106	8.909	Periplasmic	L-caleosin
	GhCLO03	GH_A09G0747.1	ZJU	A09	2031	714	6	237	27.038	8.617	Cytoplasmic	H-caleosin
	GhCLO04	GH_A09G0778.1	ZJU	A09	1723	708	6	235	26.487	5.883	Periplasmic	H-caleosin
	GhCLO05	GH_A09G0779.1	ZJU	A09	2220	696	7	231	26.433	6.087	Periplasmic	H-caleosin
	GhCLO06	GH_A09G0780.1	ZJU	A09	1554	690	6	229	26.165	6.719	Cytoplasmic	H-caleosin
	GhCLO07	GH_A09G0781.1	ZJU	A09	2404	702	6	233	26.527	6.4	Cytoplasmic	H-caleosin
	GhCLO08	GH_A10G1110.1	ZJU	A10	2642	711	6	236	26.814	6.793	Periplasmic	H-caleosin
	GhCLO09	GH_A10G1111.1	ZJU	A10	2725	711	6	236	26.611	6.045	Cytoplasmic	H-caleosin
	GhCLO10	GH_A12G1707.1	ZJU	A12	1480	567	6	188	21.266	8.671	Cytoplasmic	L-caleosin
	GhCLO11	GH_D01G1678.1	ZJU	D01	1331	609	6	202	22.8	8.917	Cytoplasmic	L-caleosin
	GhCLO12	GH_D04G2064.1	ZJU	D04	4150	621	6	206	23.038	7.075	Extracellular	L-caleosin
	GhCLO13	GH_D09G0686.1	ZJU	D09	2377	714	6	237	27.157	8.942	Cytoplasmic	H-caleosin
	GhCLO14	GH_D09G0719.1	ZJU	D09	1718	708	6	235	26.453	5.884	Periplasmic	H-caleosin
	GhCLO15	GH_D09G0720.1	ZJU	D09	1395	699	6	232	26.692	6.51	Cytoplasmic	H-caleosin
	GhCLO16	GH_D09G0722.1	ZJU	D09	2294	714	6	237	27.192	7.685	Cytoplasmic	H-caleosin
	GhCLO17	GH_D10G1768.1	ZJU	D10	2788	711	6	236	26.855	7.489	Periplasmic	H-caleosin
	GhCLO18	GH_D10G1769.1	ZJU	D10	2803	711	6	236	26.675	6.146	Cytoplasmic	H-caleosin
	GhCLO19	GH_D12G1703.1	ZJU	D12	1566	630	6	209	23.475	6.531	Cytoplasmic	L-caleosin
Gossypium barbadense	GbCLO01	Gbar_A01G014520.1	HAU	A01	2097	609	7	202	22.76	8.916	Cytoplasmic	L-caleosin
	GbCLO02	Gbar_A04G015320.1	HAU	A04	3688	621	6	206	23.106	8.909	Periplasmic	L-caleosin
	GbCLO03	Gbar_A09G006550.1	HAU	A09	2956	714	6	237	26.983	7.75	Cytoplasmic	H-caleosin
	GbCLO04	Gbar_A09G006820.1	HAU	A09	1770	708	6	235	26.487	5.883	Periplasmic	H-caleosin
	GbCLO05	Gbar_A09G006830.1	HAU	A09	2697	699	7	232	26.534	6.086	Periplasmic	H-caleosin
	GbCLO06	Gbar_A09G006840.1	HAU	A09	2975	702	6	233	26.527	6.4	Cytoplasmic	H-caleosin
	GbCLO07	Gbar_A10G011750.1	HAU	A10	3122	711	6	236	26.827	6.793	Periplasmic	H-caleosin
	GbCLO08	Gbar_A10G011760.1	HAU	A10	3758	711	6	236	26.611	6.045	Cytoplasmic	H-caleosin
	GbCLO09	Gbar_A12G016370.1	HAU	A12	1978	630	6	209	23.588	8.919	Cytoplasmic	L-caleosin
	GbCLO10	Gbar_D01G015400.1	HAU	D01	2987	594	7	197	22.401	9.268	Cytoplasmic	L-caleosin
	GbCLO11	Gbar_D04G020130.1	HAU	D04	4562	555	6	184	20.723	8.92	Periplasmic	L-caleosin
	GbCLO12	Gbar_D09G006240.1	HAU	D09	6579	714	9	237	27.072	8.615	Cytoplasmic	H-caleosin
	GbCLO13	Gbar_D09G006540.1	HAU	D09	1943	708	6	235	26.453	5.884	Periplasmic	H-caleosin
	GbCLO14	Gbar_D09G006550.1	HAU	D09	1395	699	6	232	26.616	6.51	Cytoplasmic	H-caleosin
	GbCLO15	Gbar_D09G006570.1	HAU	D09	2941	432	6	143	16.16	6.507	Cytoplasmic	H-caleosin
	GbCLO16	Gbar_D10G016670.1	HAU	D10	2882	891	5	296	33.369	6.664	Periplasmic	H-caleosin
	GbCLO17	Gbar_D10G016680.1	HAU	D10	3773	711	6	236	26.651	5.812	Cytoplasmic	H-caleosin
	GbCLO18	Gbar_D12G016470.1	HAU	D12	2019	630	6	209	23.475	6.531	Cytoplasmic	L-caleosin
